# Supplementary material for: Development of a series of flurbiprofen and zaltoprofen platinum(iv) complexes with anti-metastasis competence targeting COX-2, PD-L1 and DNA
Source: Royal Society of Chemistry journal article supplement (doi:10.1039/d2dt00944g), 2022-01-01
Supplement: d2dt00944g1.pdf [file d2dt00944g1.pdf]

Supporting Information for

# Development of a series of flurbiprofen and zaltoprofen platinum(IV) complexes with anti-metastasis competence targeting COX-2, PD-L1 and DNA

Zuojie Li<sup>a</sup>, Linming Li<sup>a,b</sup>, Wenhuan Zhao<sup>c</sup>, Bin Sun<sup>a</sup>, Zhifang Liu<sup>a</sup>, Min Liu<sup>a</sup>, Jun Han<sup>a</sup>, Zhengping Wang<sup>a,b</sup>, Dacheng Li<sup>a,d</sup> and Qingpeng Wang<sup>a\*</sup>

---

<sup>a</sup> Institute of Biopharmaceutical Research, Liaocheng University, Liaocheng 252059, P.R. China. E-mail: lywqp@126.com (Q. Wang).

<sup>b</sup> Liaocheng High-Tech Biotechnology Co., Ltd, Liaocheng 252059, P.R. China.

<sup>c</sup> Frontier Biotechnologies Inc., Nanjing 210000, P.R. China.

<sup>d</sup> Shandong Provincial Key Laboratory of Chemical Energy Storage and Novel Cell Technology, Liaocheng University, Liaocheng 252059, P.R. China.

## Contents

|                                                                                    |    |
|------------------------------------------------------------------------------------|----|
| 1. The synthetic route of flurbiprofen and zaltoprofen platinum(IV) complexes..... | 2  |
| 2. The antitumor activities <i>in vivo</i> .....                                   | 2  |
| 3. Metastasis inhibitory activities <i>in vitro</i> .....                          | 5  |
| 4. The reduction potential and DNA binding properties .....                        | 6  |
| 5. <sup>1</sup> H NMR, <sup>13</sup> C NMR and MS spectra.....                     | 7  |
| Reference .....                                                                    | 20 |

## 1. The synthetic route of flurbiprofen and zaltoprofen platinum(IV) complexes

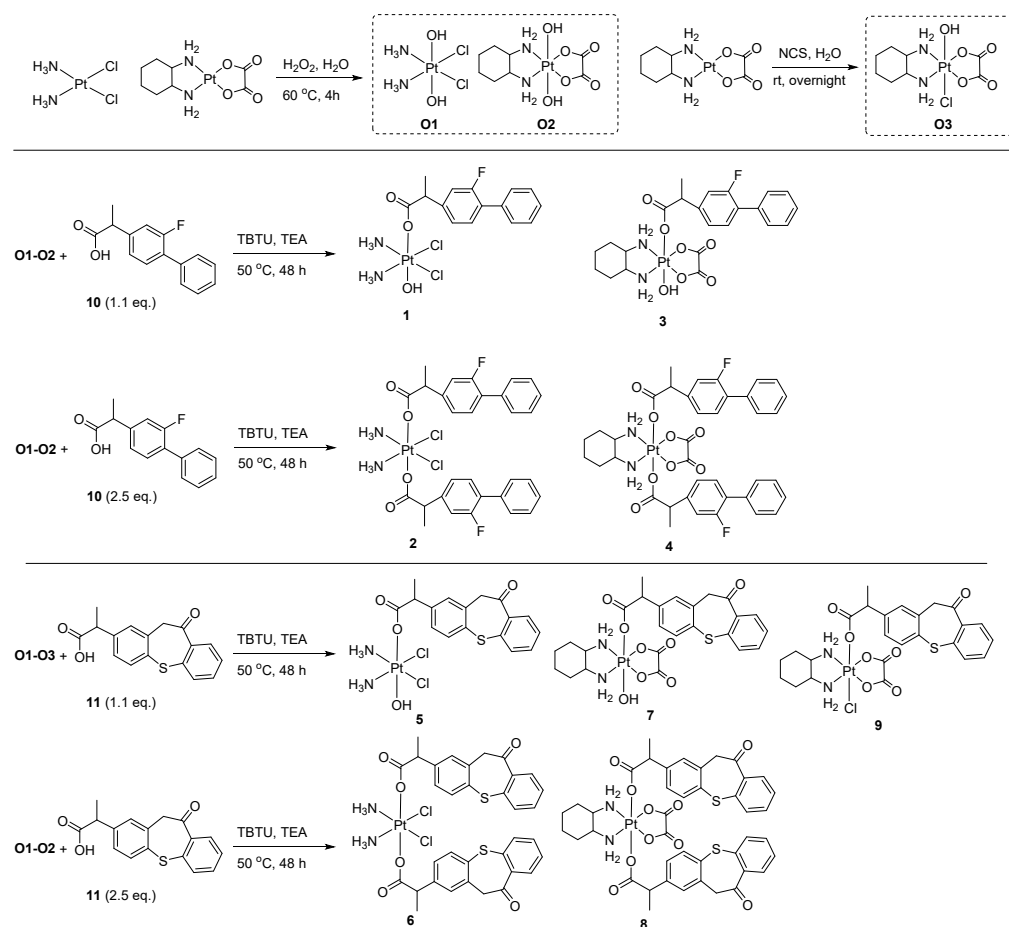

**Scheme S1** Synthetic route for flurbiprofen and zaltoprofen platinum(IV) complexes 1-9.

## 2. The antitumor activities *in vivo*

To compare the antitumor activities of NSAIDs platinum(IV) complexes extensively, platinum(IV) complexes 1-10 with ketoprofen and loxoprofen ligands listed in our previous work<sup>S1</sup> (signed as J1-J10 in this manuscript) and complexes 1-9 bearing flurbiprofen, zaltoprofen in this work were tested at the same time both *in vitro* and *in vivo* with same control groups. The MTT results were given in Table 1 with cisplatin and oxaliplatin as reference drugs. Meanwhile, the antitumor activities for complexes 1, 2, 5, 6, J1, J7, J9, cisplatin and oxaliplatin *in vivo* against CT26 tumors were shown in Figure S1 and Figure 3, the antitumor activities *in vivo* against 4T1 tumors were shown in Figure S2 and Figure 4, and the anti-metastasis properties against 4T1 breast carcinoma tumors *in vivo* were shown in Figure S6 and Figure 5.

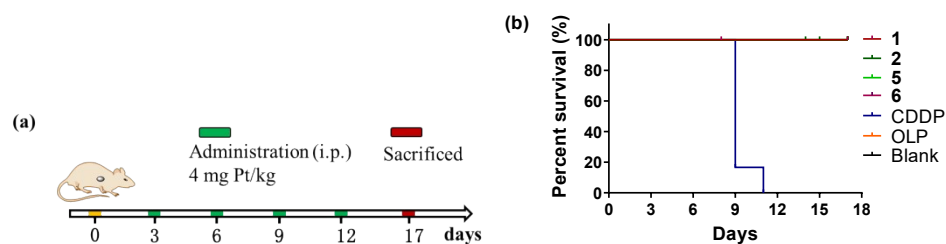

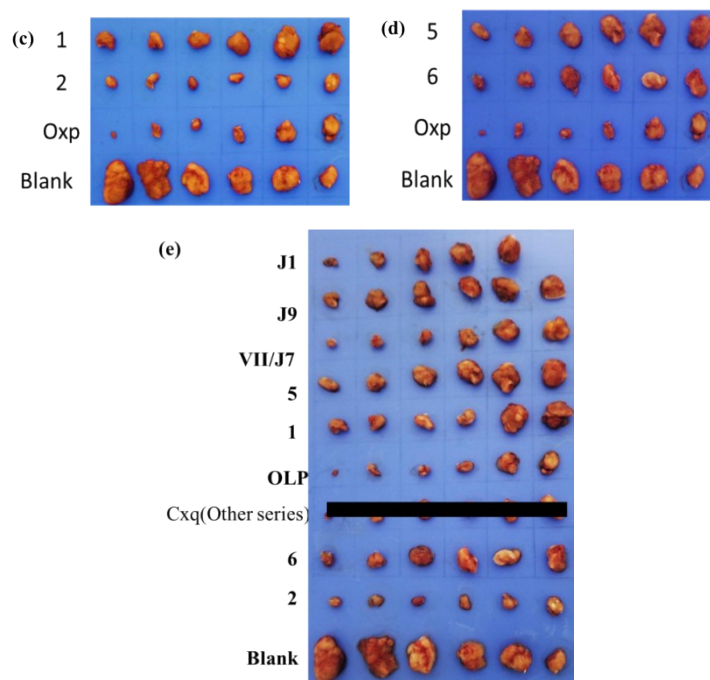

**Figure S1** *In vivo* antitumor activities to CT-26 tumors in BALB/c mice ( $n = 6$ ). (a) Schematic illustration of the experimental design. (b) Survival analysis of mice during the treatment of **1**, **2**, **5**, **6**, cisplatin and oxaliplatin. (c) Images of tumors treated by **1**, **2**, oxaliplatin and blank. (d) Images of tumors treated by **5**, **6**, oxaliplatin and blank. Figure 3d is a combination of images (c) and (d). (e) Full images of tumors treated by **1**, **2**, **5**, **6**, **J1**, **J7 (VII)**, **J9** and oxaliplatin and blank. Reprinted with permission from Li et al., *J. Med. Chem.*, 2021, **64**, 17920. Copyright 2021 American Chemical Society <sup>S1</sup>.

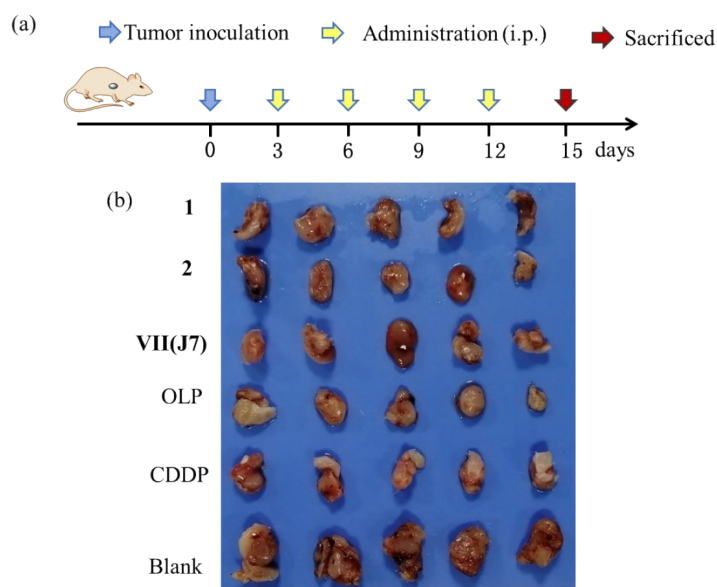

**Figure S2** *In vivo* antitumor activities to 4T1 tumors in BALB/c mice ( $n = 5$ ). (a) Schematic illustration of the experimental design. (b) Full images of tumors treated by drugs **1**, **2**, **J7 (VII)**, cisplatin and oxaliplatin and blank. Reprinted with permission from Li et al., *J. Med. Chem.*, 2021, **64**, 17920. Copyright 2021 American Chemical Society <sup>S1</sup>.

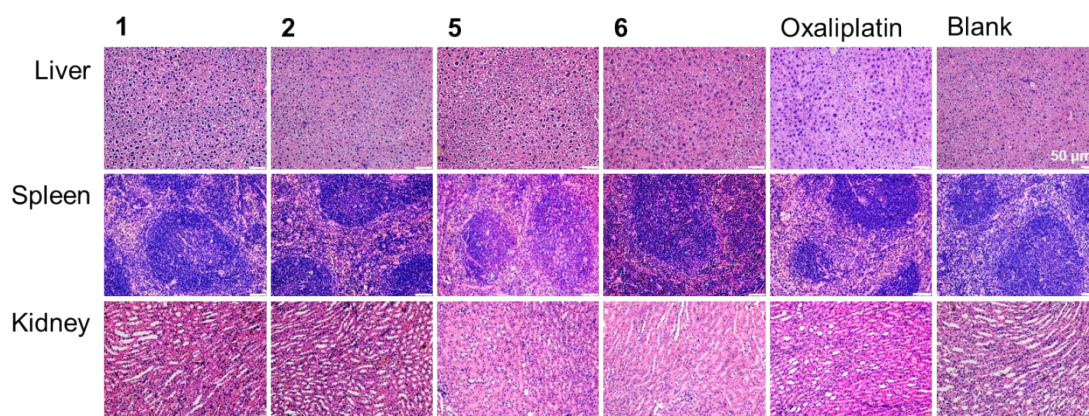

**Figure S3** H&E staining of liver, spleen and kidney from mice treated by complexes **1**, **2**, **5**, **6** and oxaliplatin and saline.

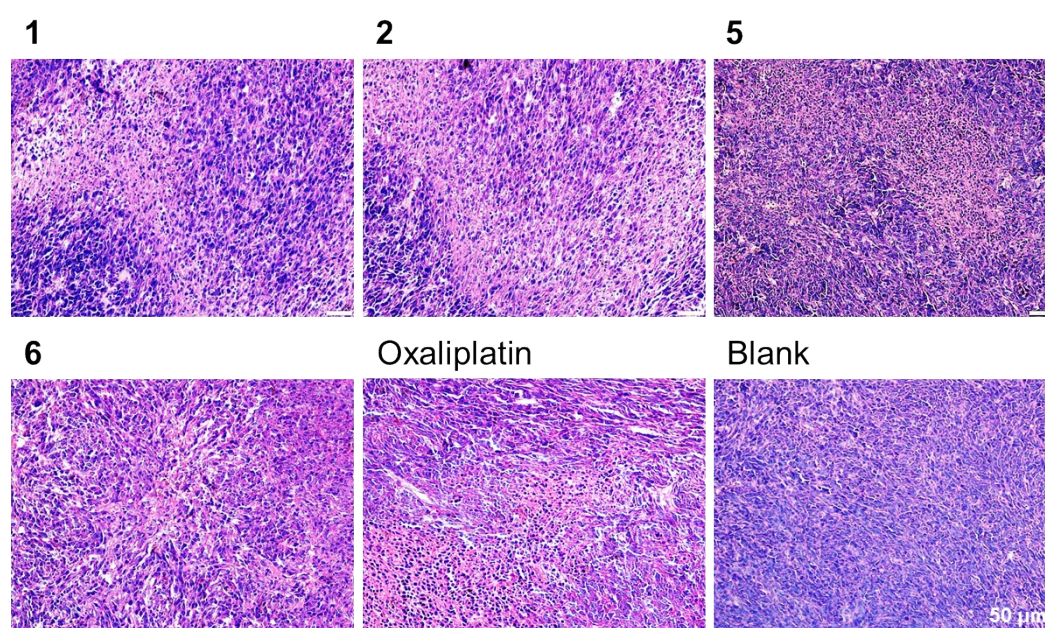

**Figure S4** H&E staining of tumor tissues from mice treated by complexes **1**, **2**, **5**, **6** and oxaliplatin and saline.

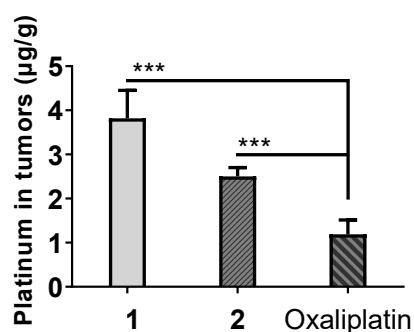

**Figure S5** Platinum accumulation in tumors tissues treated by complexes **1**, **2** and oxaliplatin.

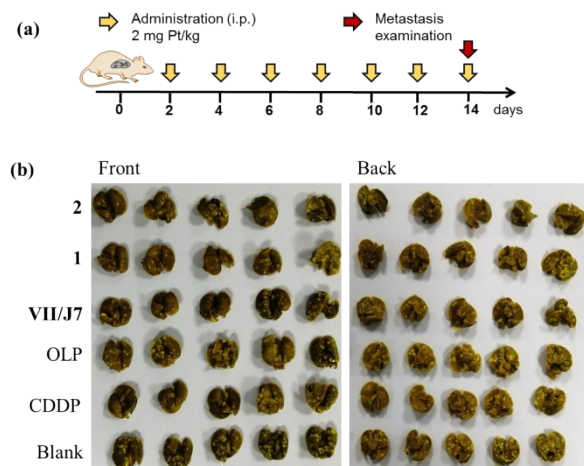

**Figure S6** Pulmonary metastasis inhibition of compounds **1**, **2**, **VII(J7)** cisplatin and oxaliplatin against 4T1 breast carcinoma tumors *in vivo* (n = 5). (a) Schematic illustration of the experimental design. (b) Full images of lungs from each group at the end of the experiment. Reprinted with permission from Li et al., *J. Med. Chem.*, 2021, **64**, 17920. Copyright 2021 American Chemical Society<sup>S1</sup>.

### 3. Metastasis inhibitory activities *in vitro*

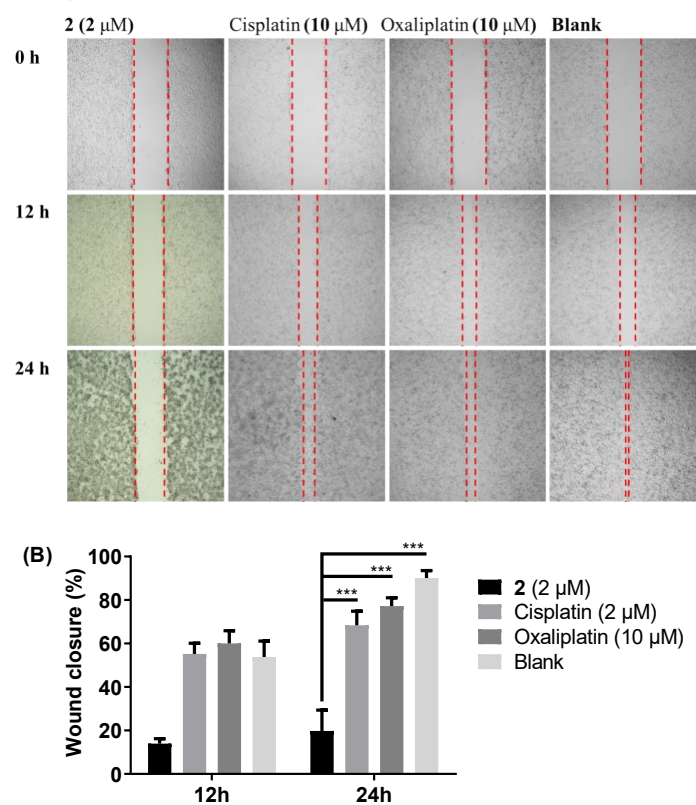

**Figure S7** Migration inhibition to 4T1 cells of complex **2** (2  $\mu\text{M}$ ), cisplatin (10  $\mu\text{M}$ ) and oxaliplatin (10  $\mu\text{M}$ ) *in vitro*. The untreated group was set as blank. The extent of wound healing was observed at 0, 12, and 24 h. (a) Representative images; (b) Analysis of wound closure.

#### 4. The reduction potential and DNA binding properties

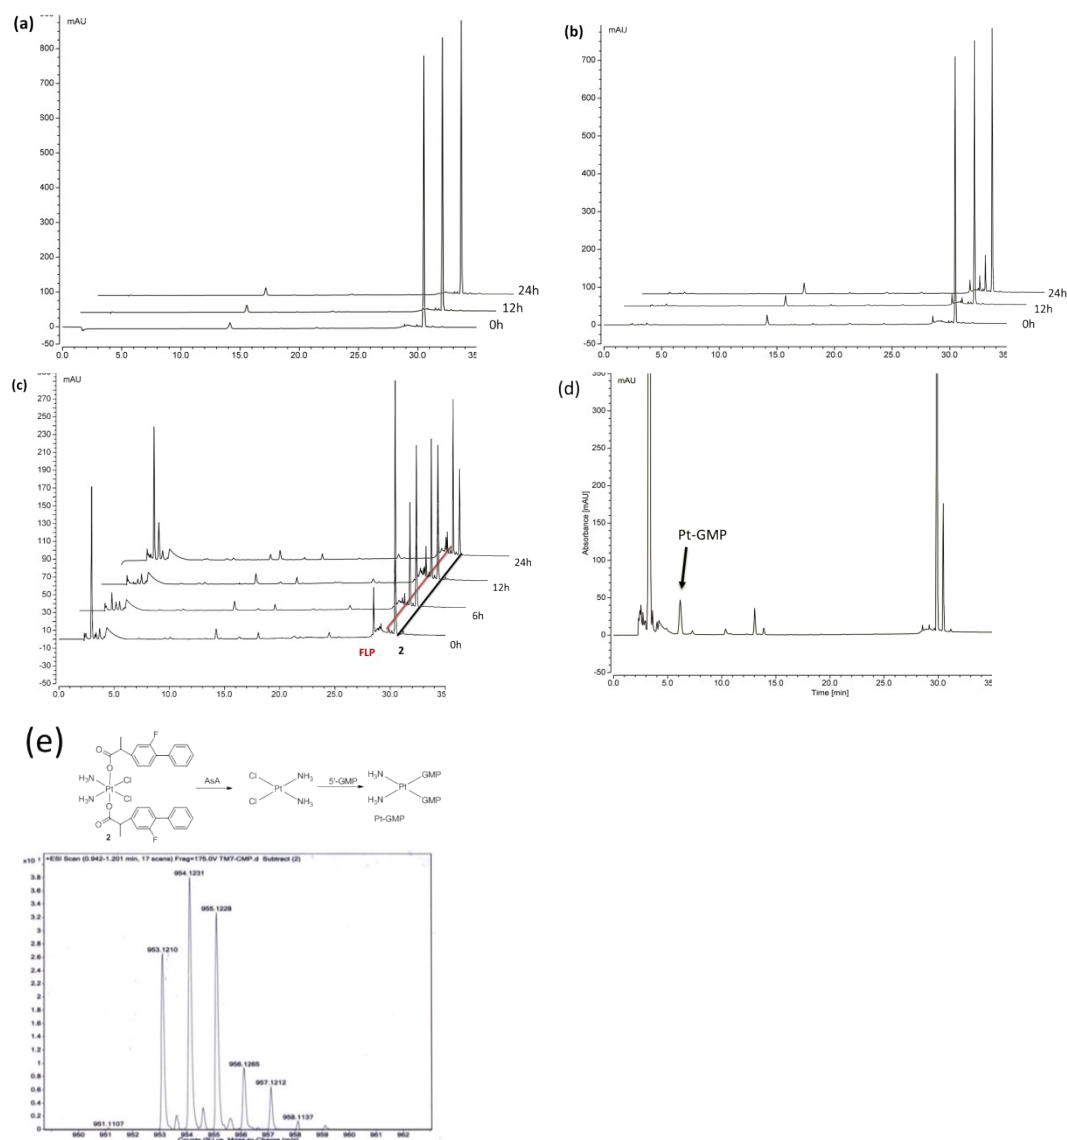

**Figure S8** HPLC spectra of compound **2** in different media incubated at 37 °C. (a) Compound **2** (0.5 mM) in PBS; (b) Compound **2** (0.5 mM) in RPMI 1640; (c) Compound **2** (0.25 mM) in RPMI 1640 with AsA (1 mM); (d) Solution of compound **2** (0.25 mM) in RPMI 1640 with AsA (1 mM) and 5'-GMP (3 mM) incubated for 24 h; (e) The formation of platinated GMP (Pt-GMP) <sup>S2</sup>.

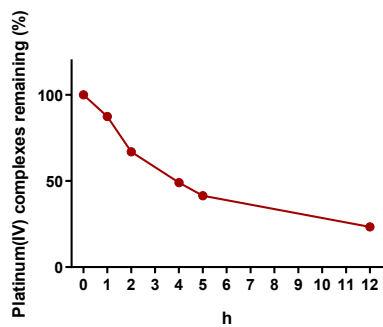

**Figure S9** Stability of complex **2** in whole blood incubated at 37 °C.

## 5. $^1\text{H}$ NMR, $^{13}\text{C}$ NMR and MS spectra

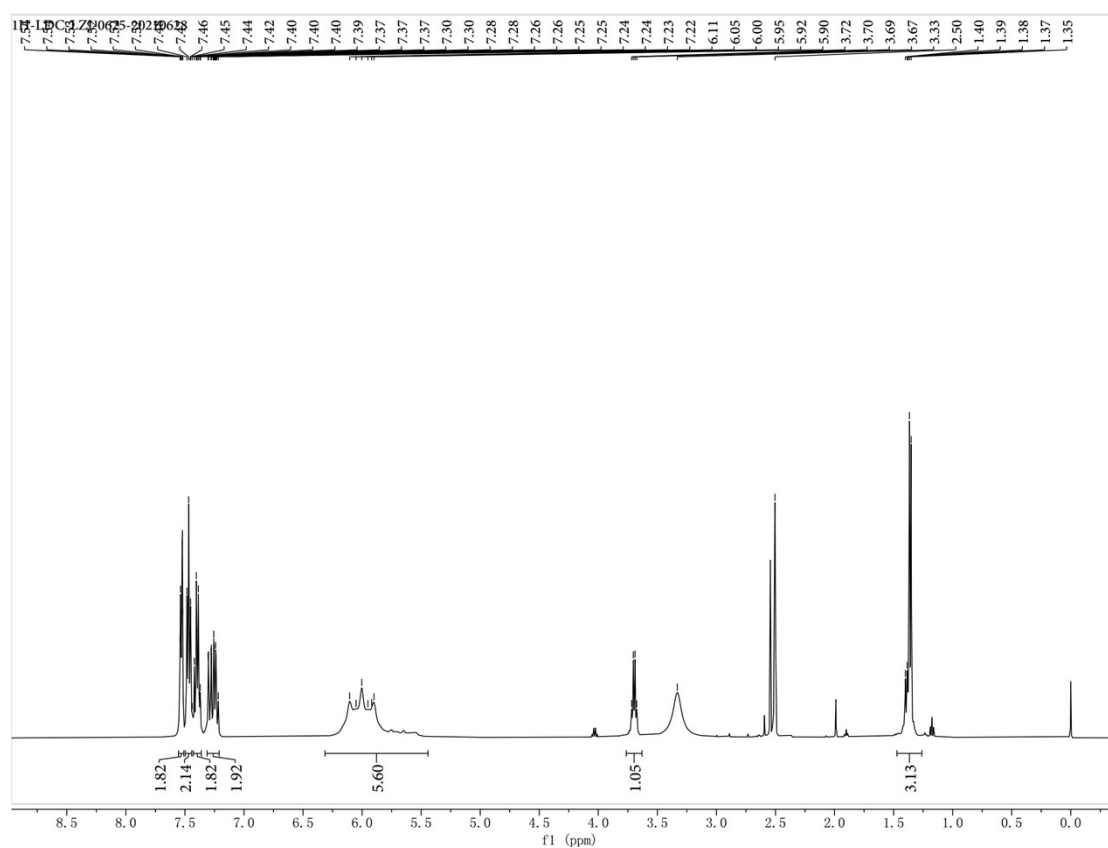

$^1\text{H}$  NMR spectrum for complex 1

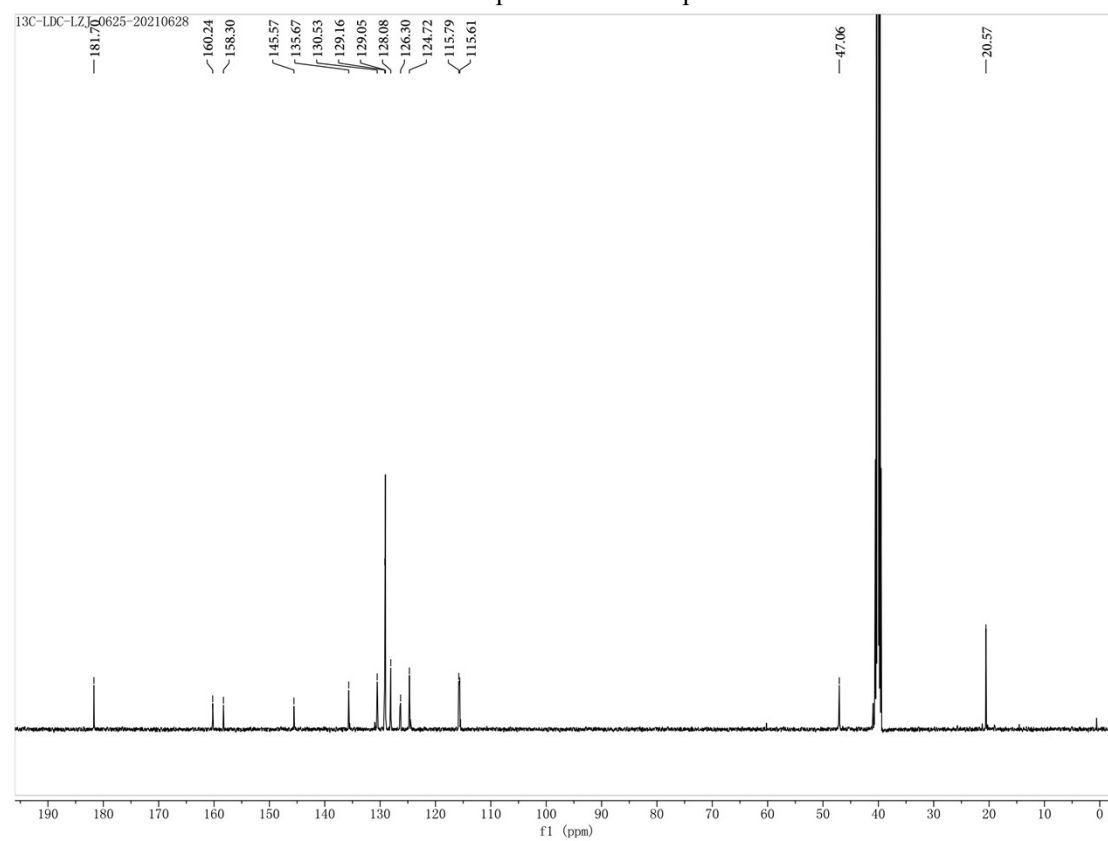

$^{13}\text{C}$  NMR spectrum for complex 1

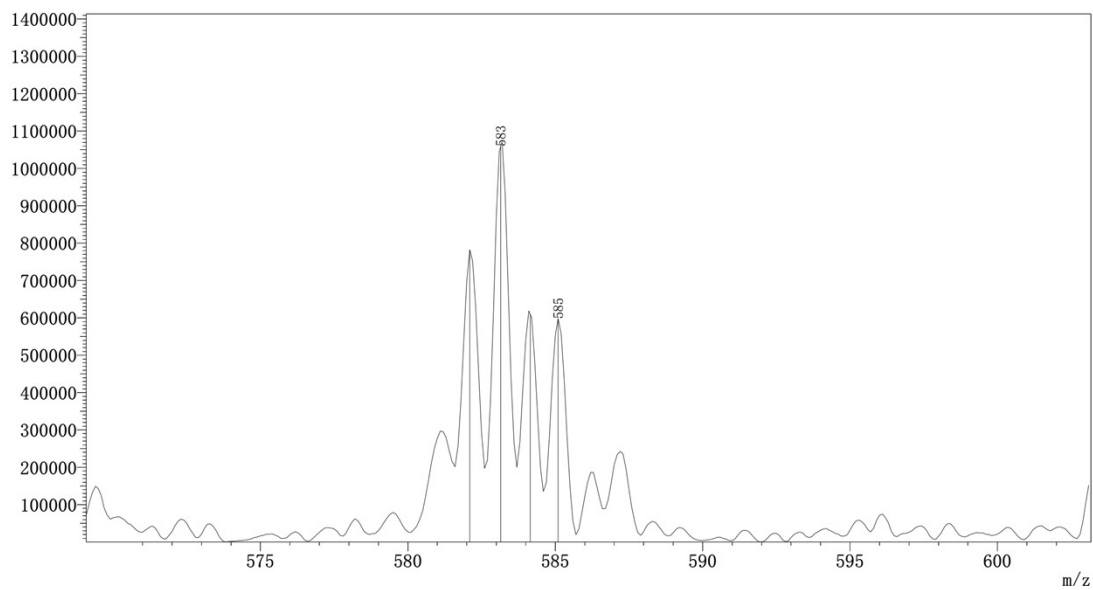

MS spectrum for complex 1

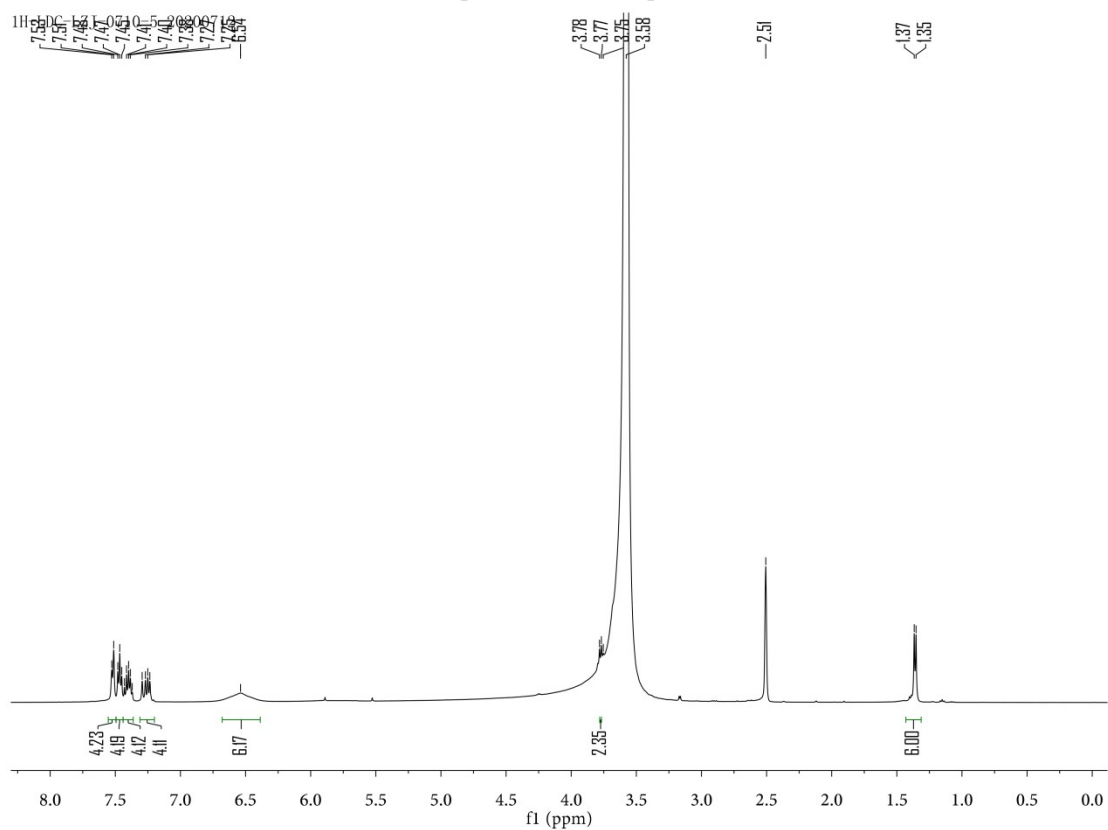

<sup>1</sup>H NMR spectrum for complex 2



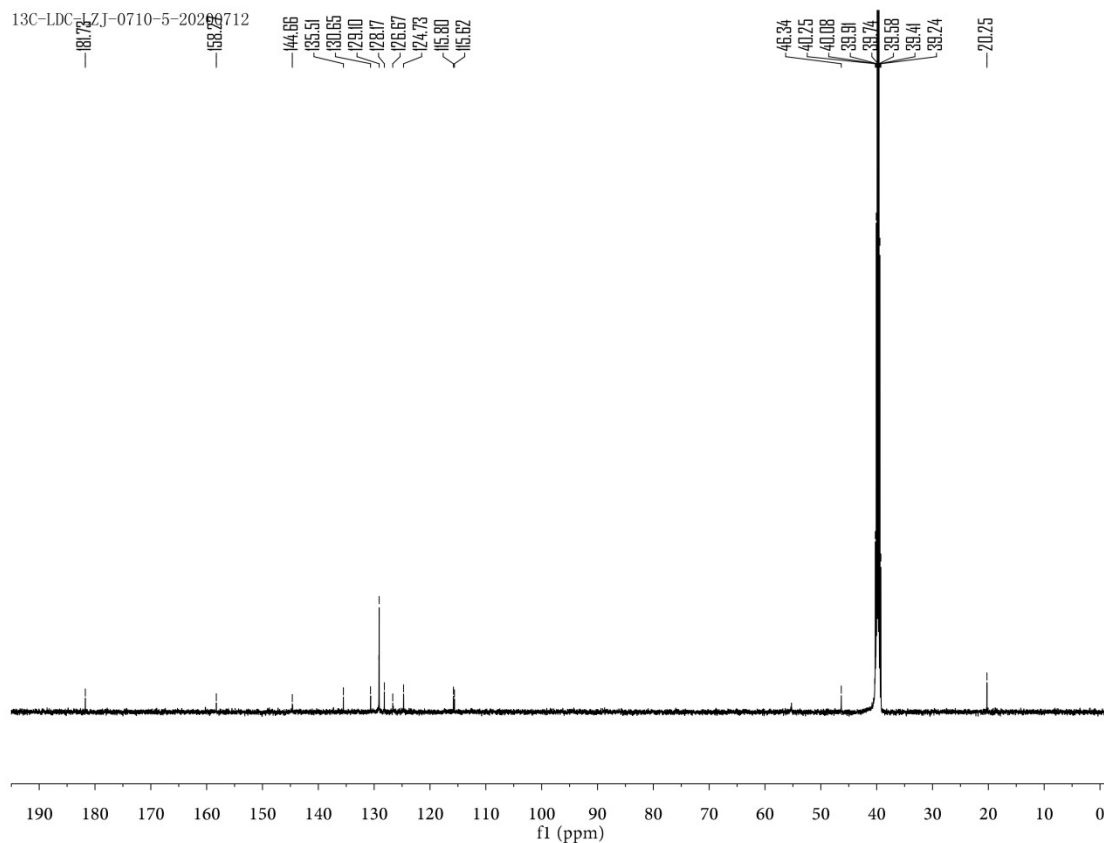

<sup>13</sup>C NMR spectrum for complex 2

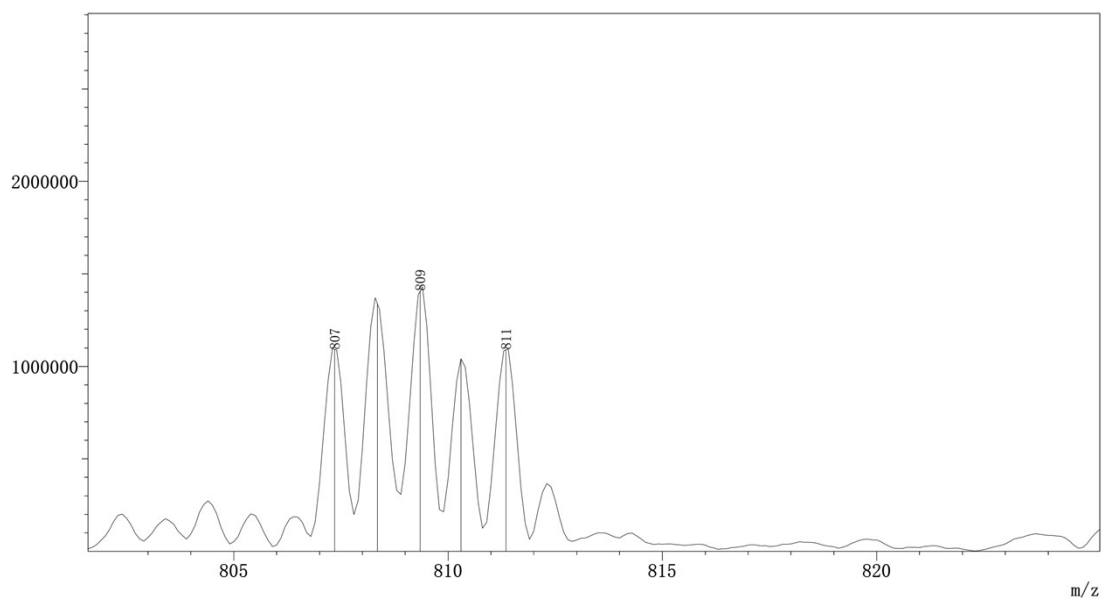

MS spectrum for complex 2

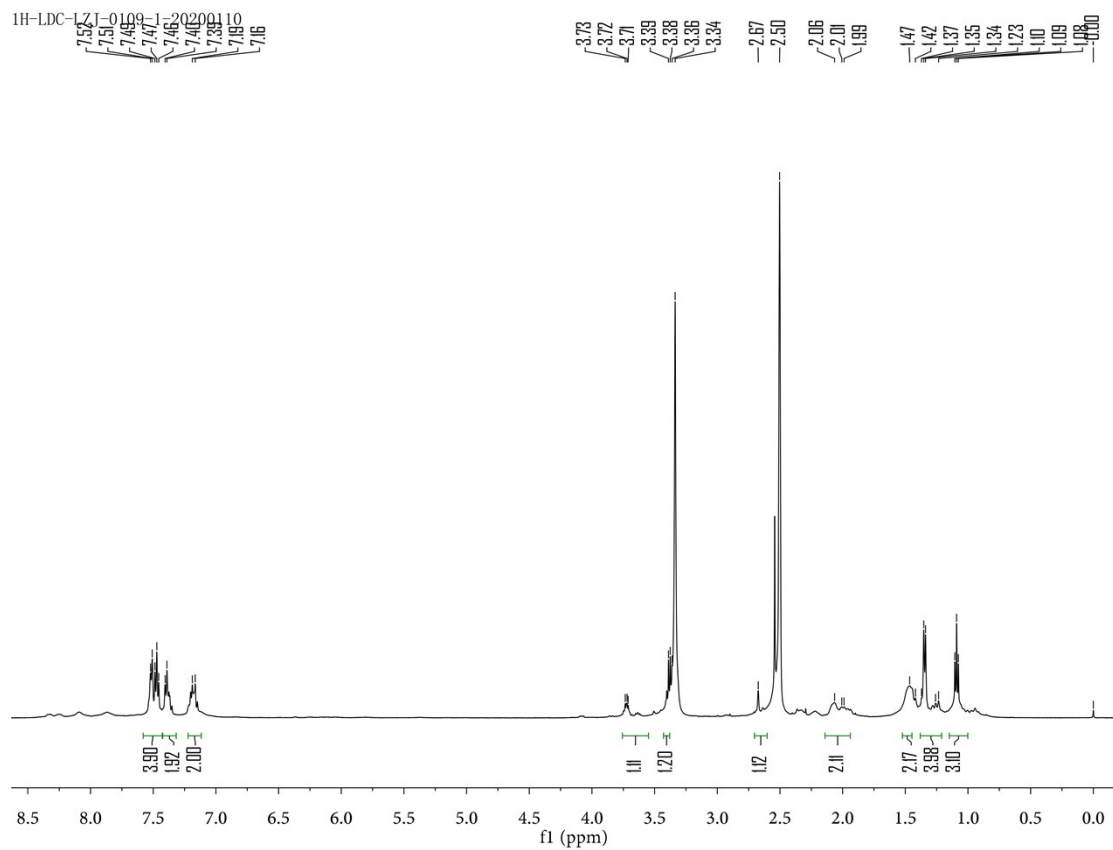

<sup>1</sup>H NMR spectrum for complex **3**

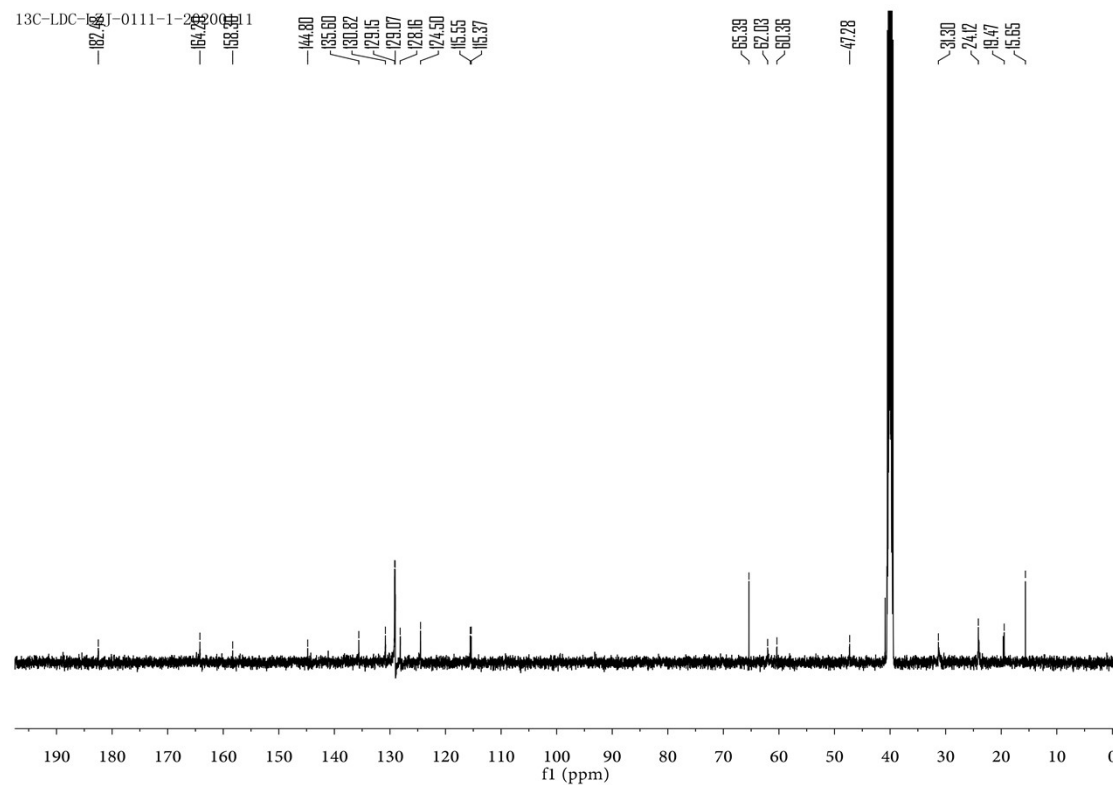

<sup>13</sup>C NMR spectrum for complex **3**

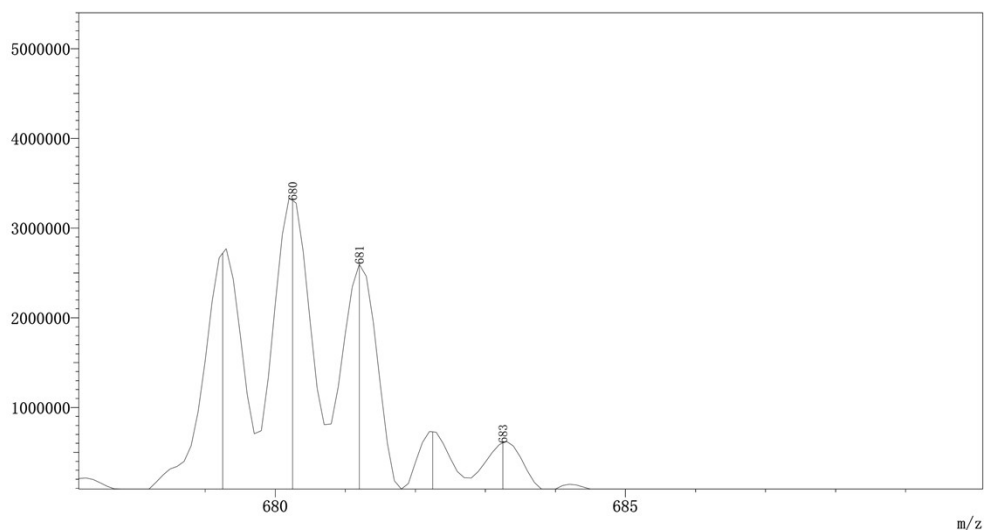

MS spectrum for complex 3

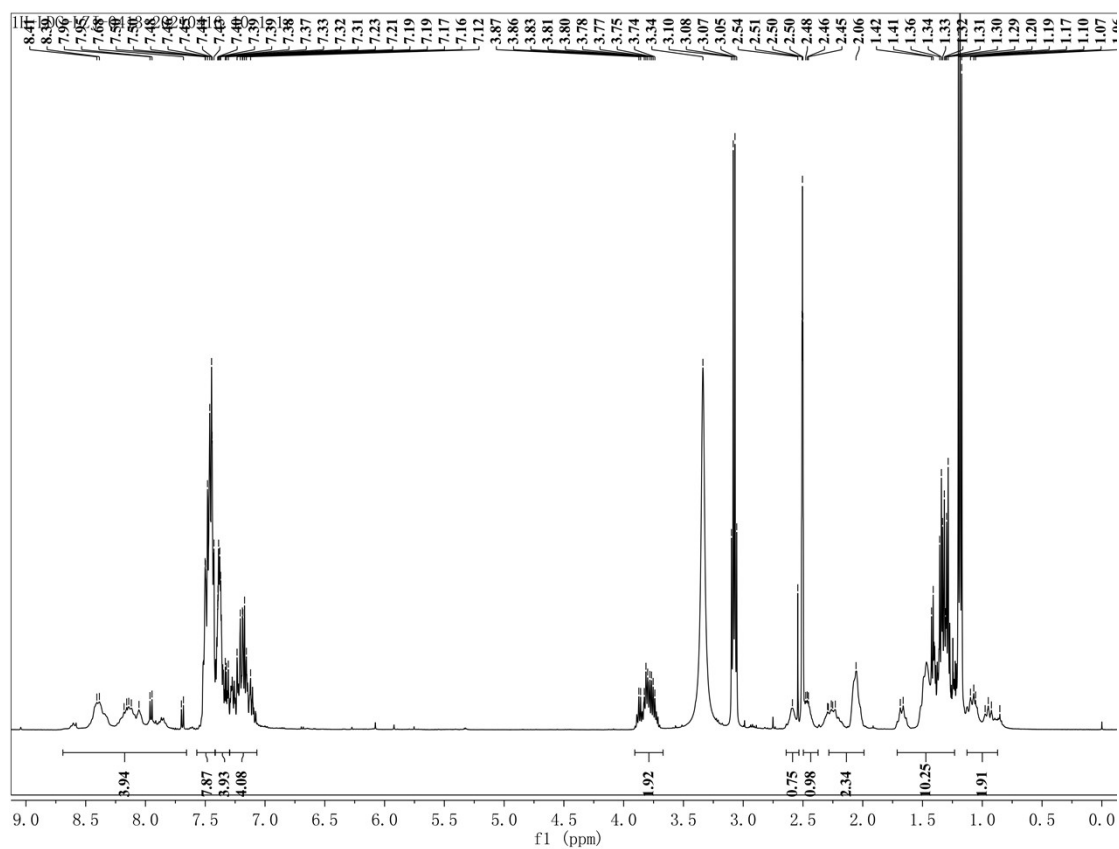

\* Peaks 3.07 ppm (q) and 1.19 ppm (t) are ascribed to Et<sub>2</sub>O.

<sup>1</sup>H NMR spectrum for complex 4

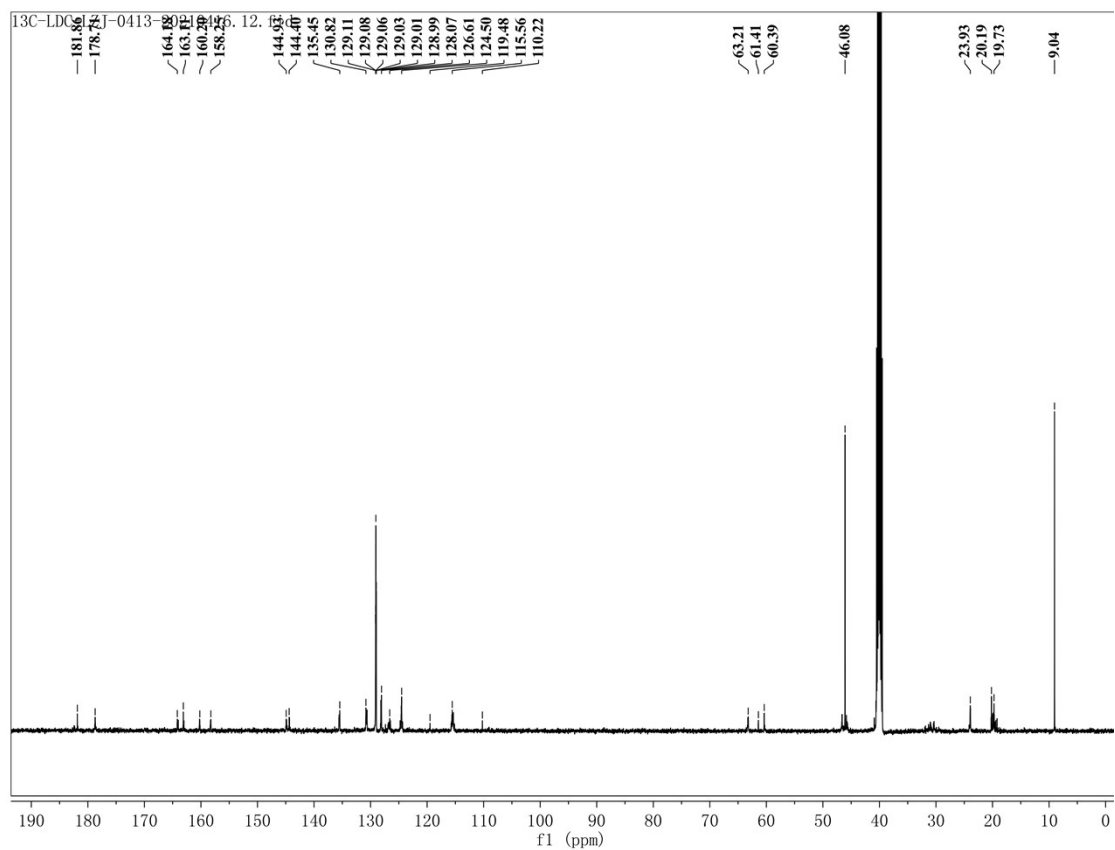

Peaks 19.73 ppm and 63.21 ppm are ascribed to Et<sub>2</sub>O.

<sup>13</sup>C NMR spectrum for complex **4**

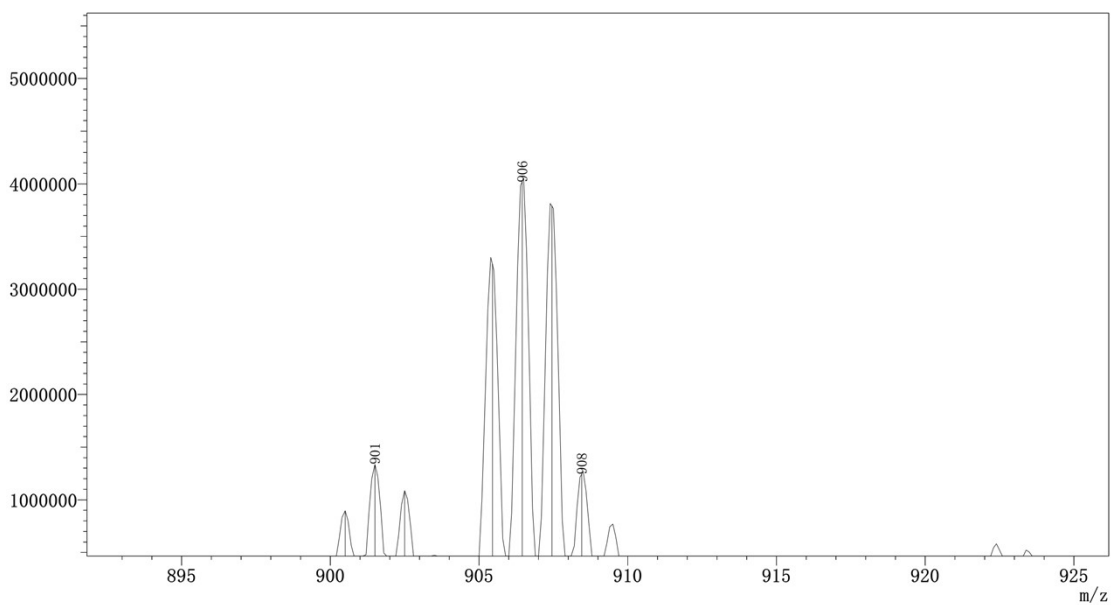

MS spectrum for complex **4**

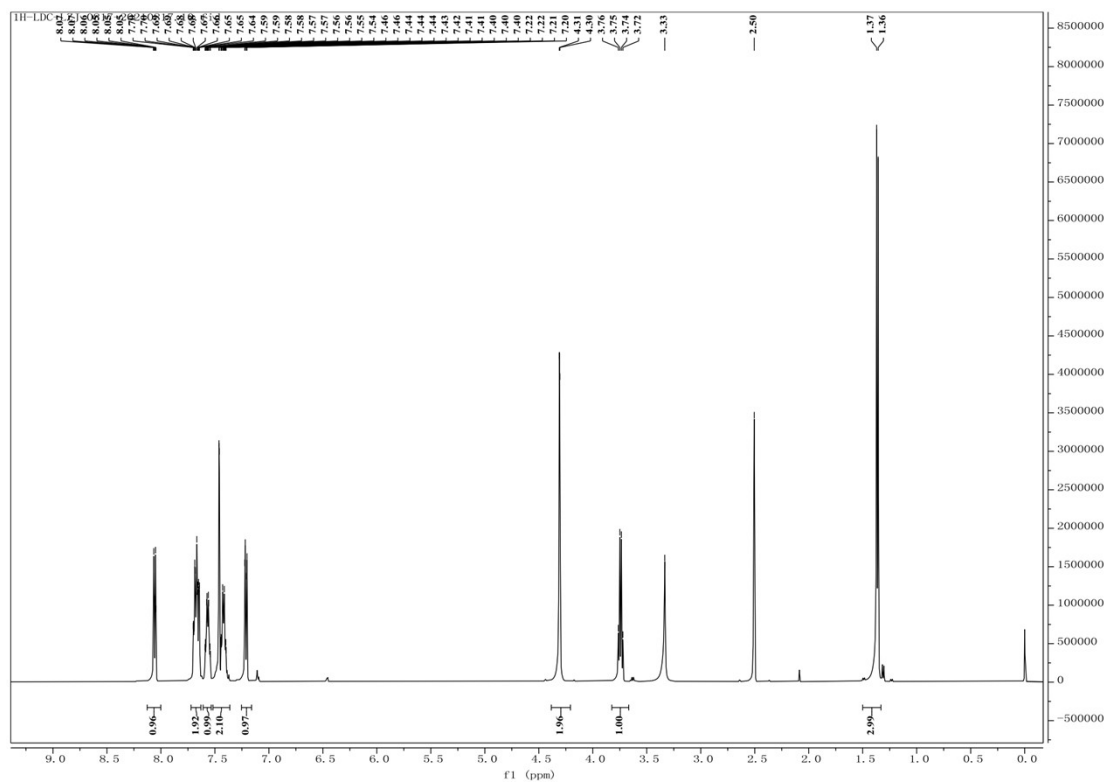

<sup>1</sup>H NMR spectrum for complex 5

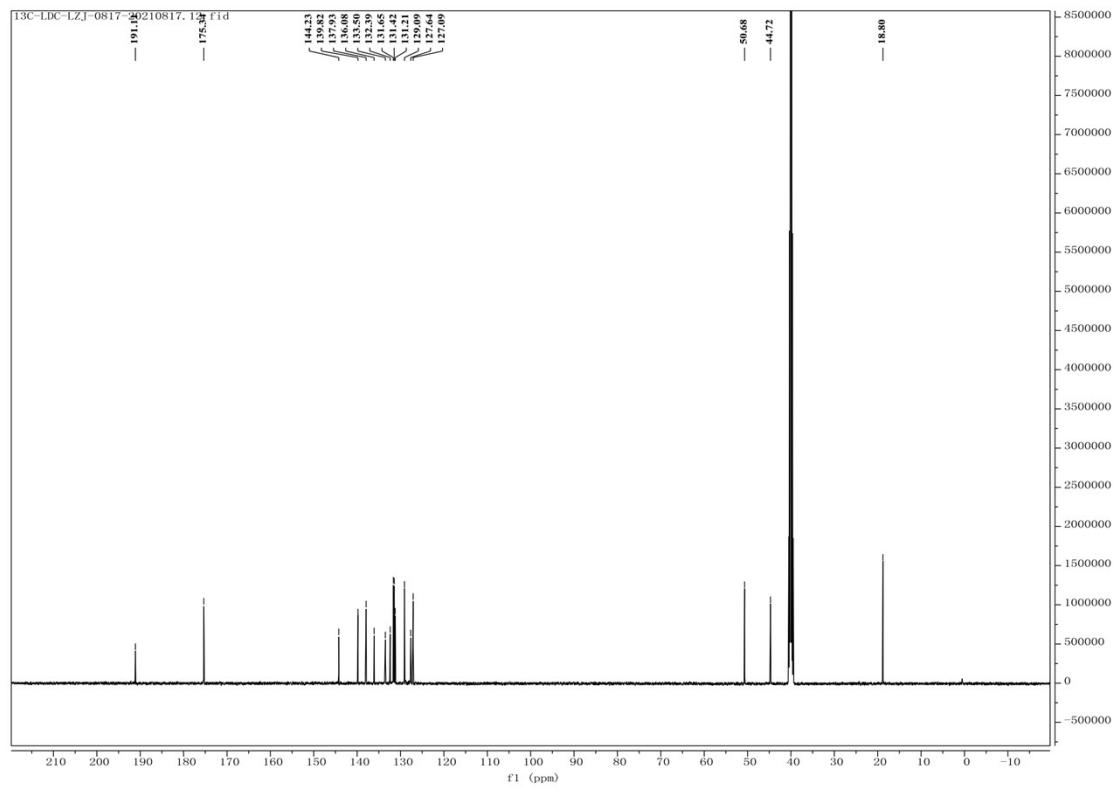

<sup>13</sup>C NMR spectrum for complex 5

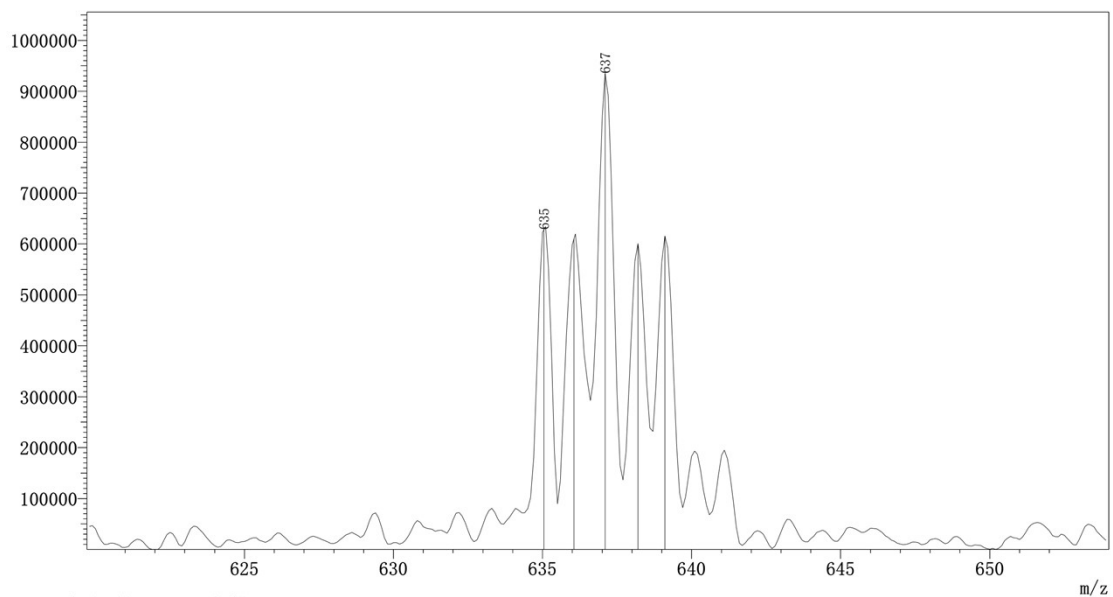

MS spectrum for complex 5

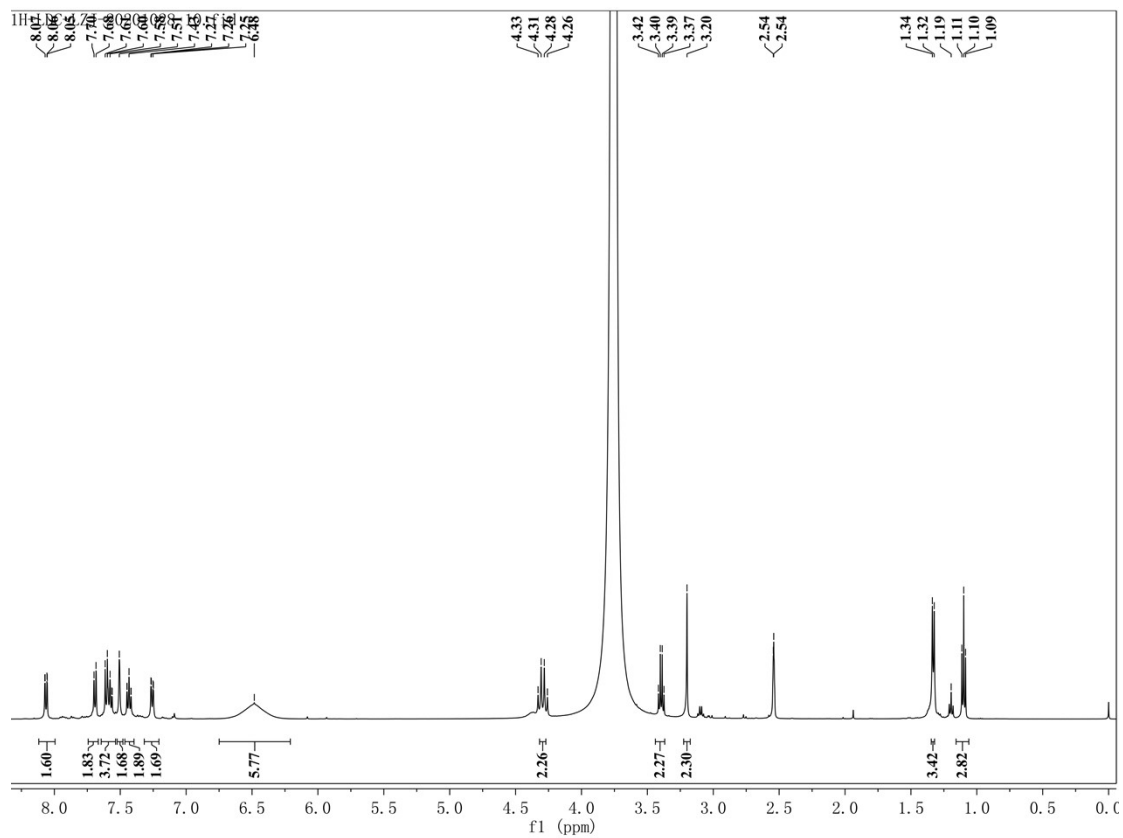

<sup>1</sup>H NMR spectrum for complex 6

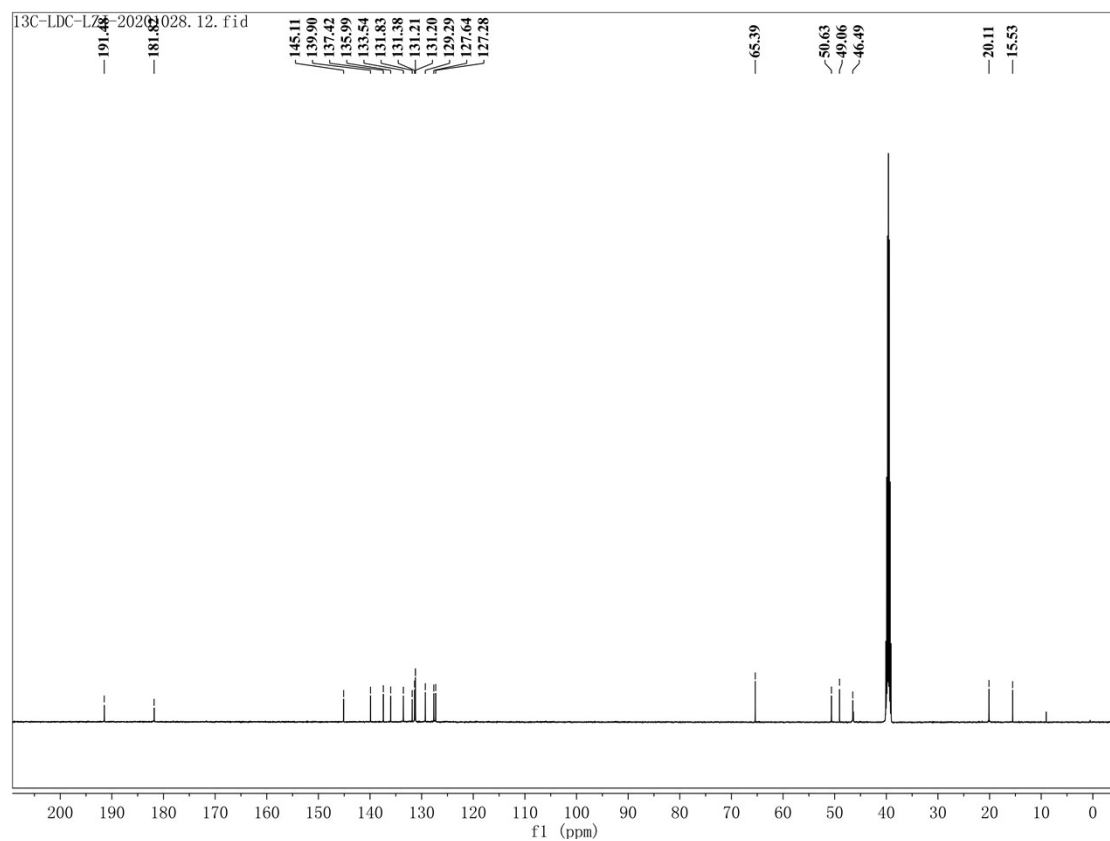

<sup>13</sup>C NMR spectrum for complex **6**

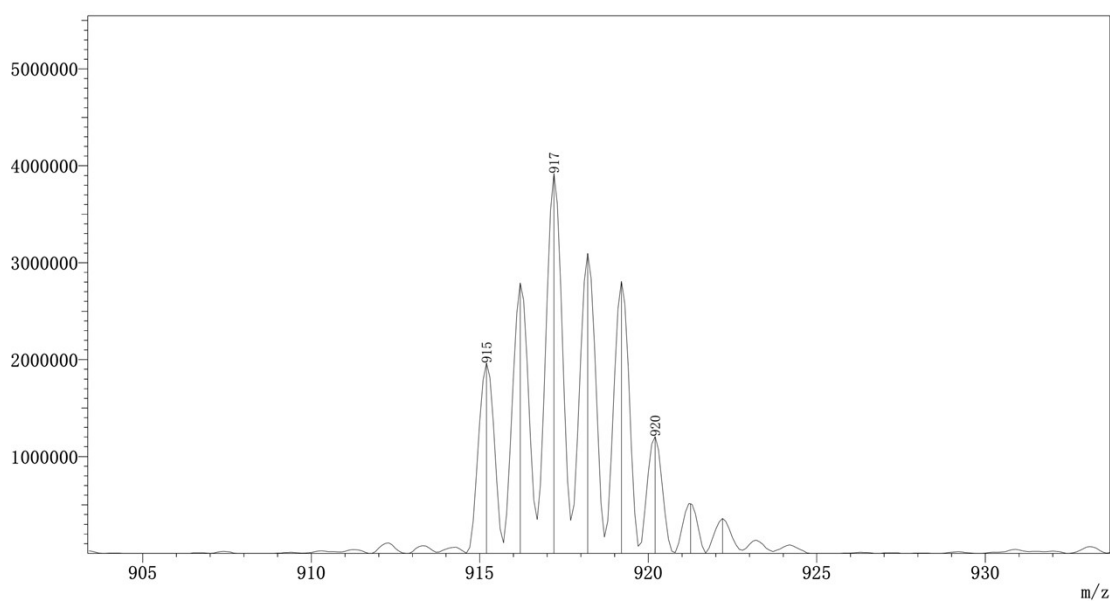

MS spectrum for complex **6**

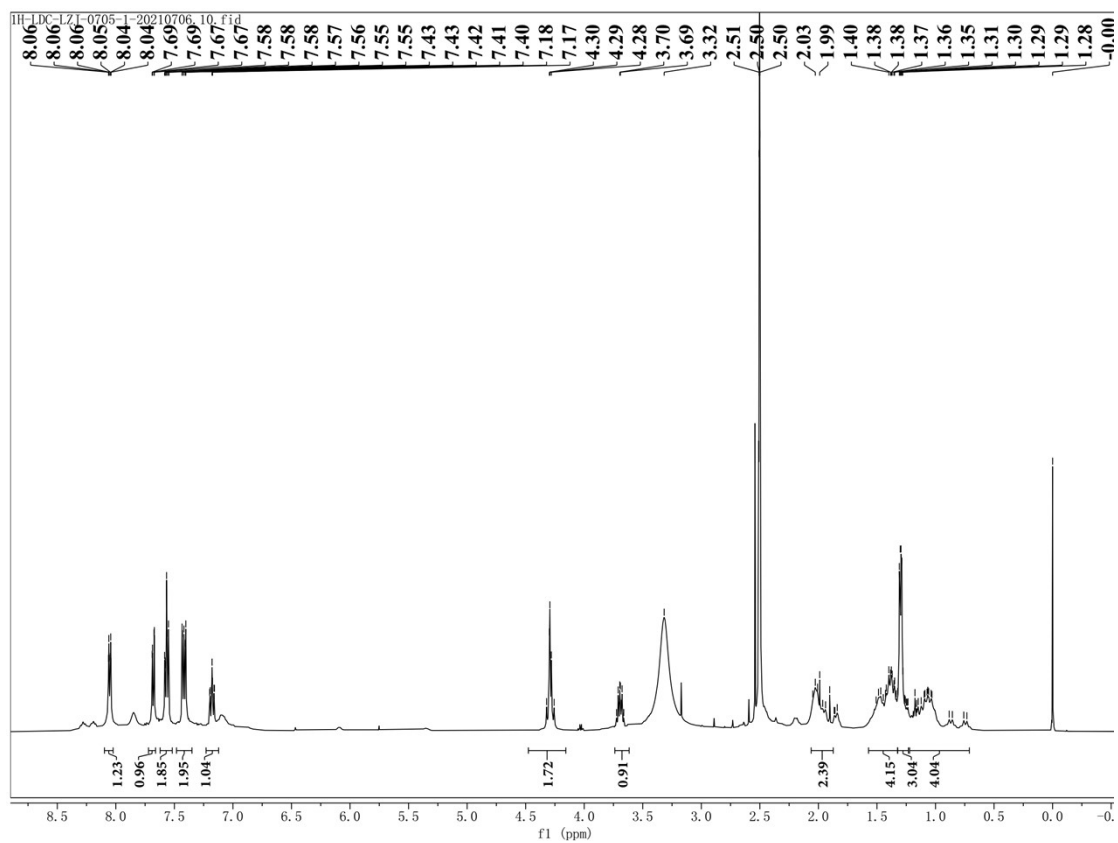

<sup>1</sup>H NMR spectrum for complex 7

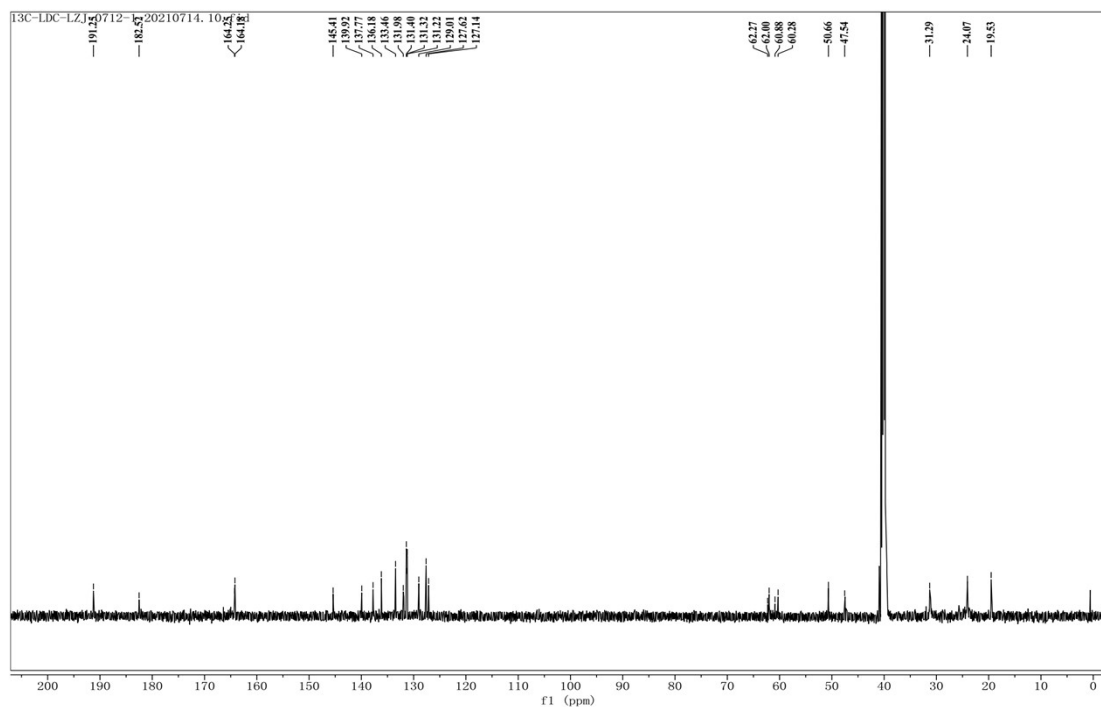

<sup>13</sup>C NMR spectrum for complex 7



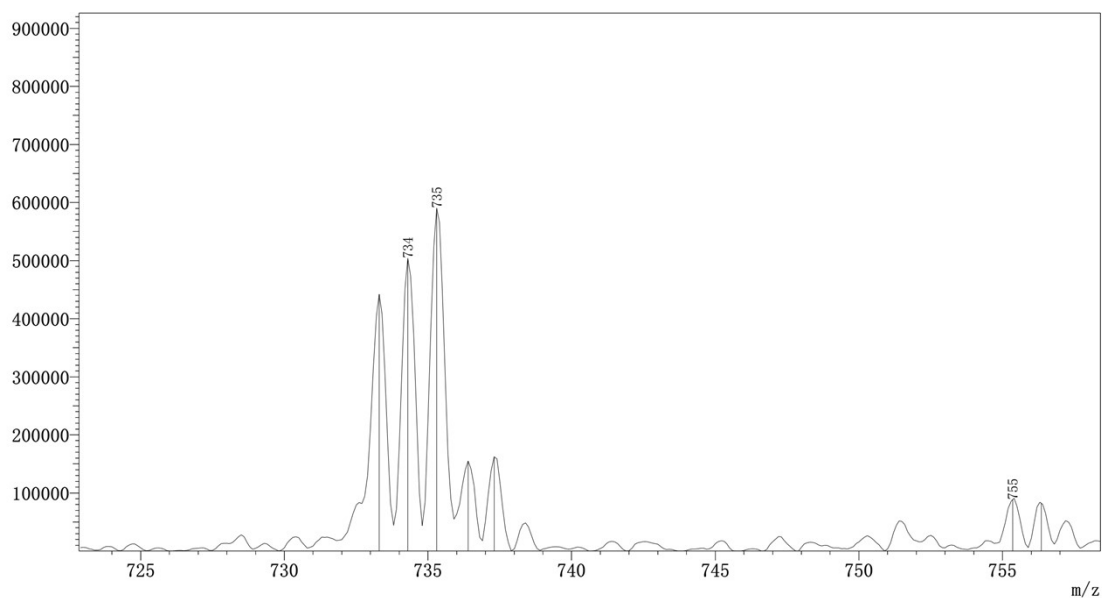

MS spectrum for complex 7

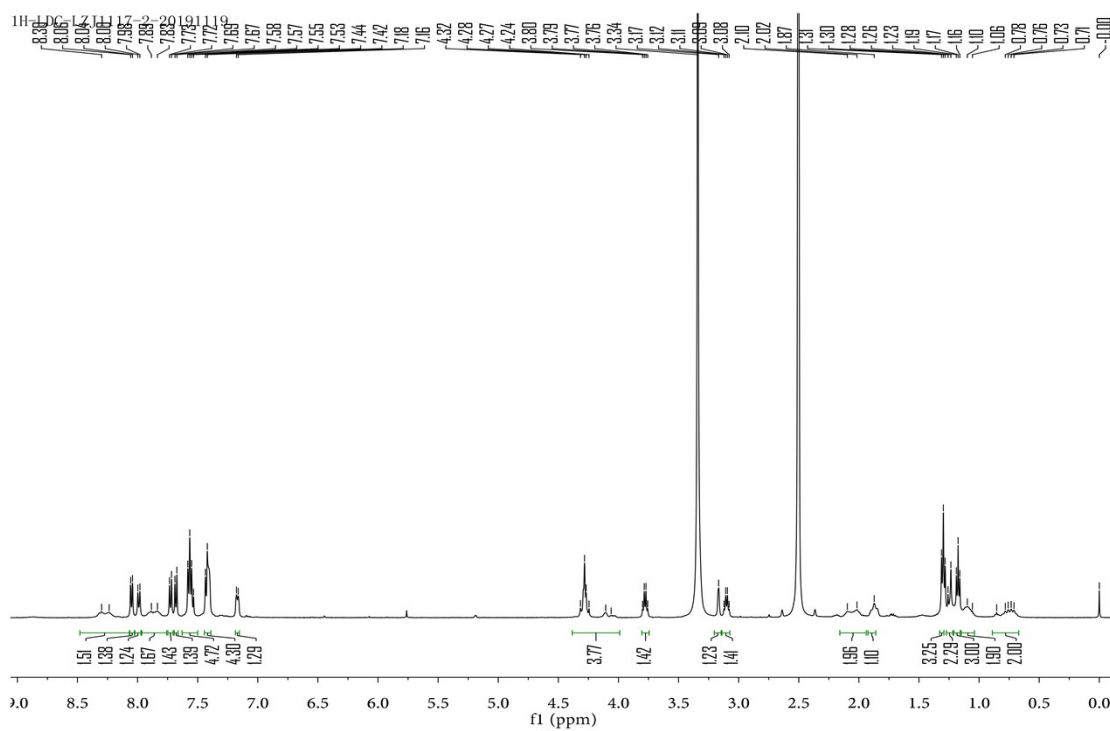

<sup>1</sup>H NMR spectrum for complex 8

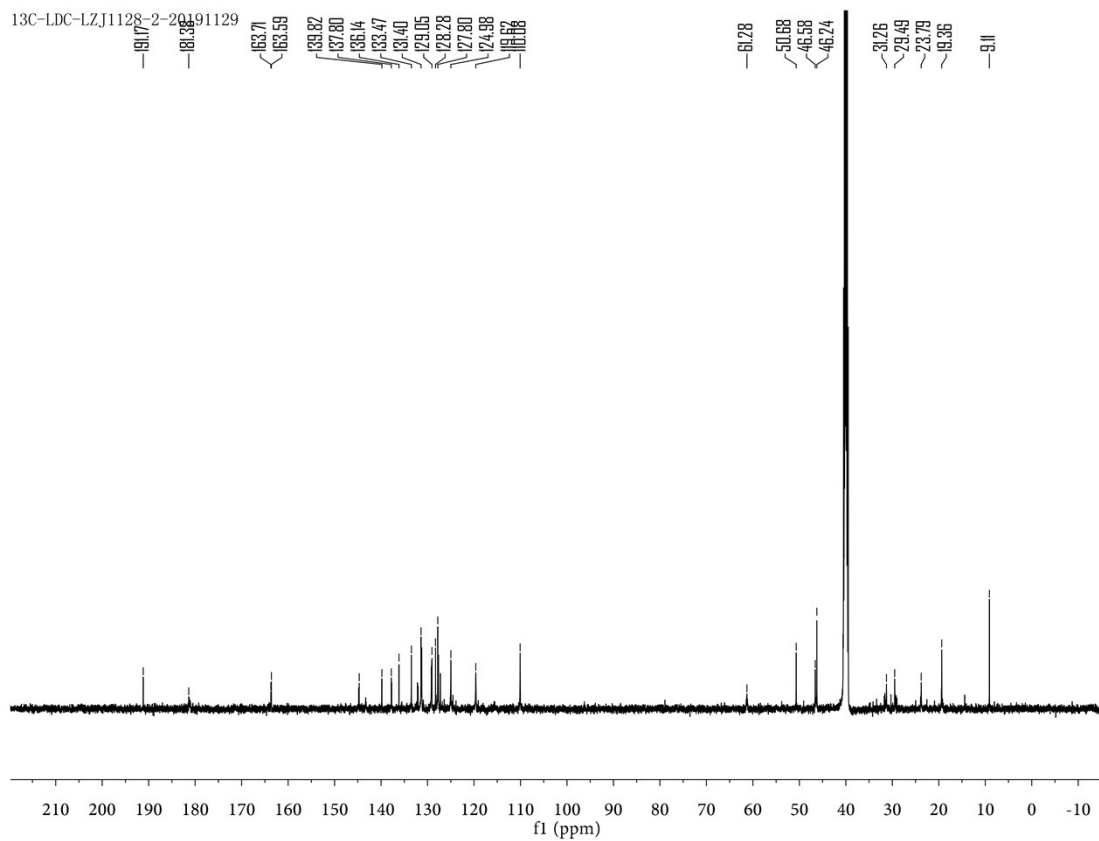

<sup>13</sup>C NMR spectrum for complex **8**

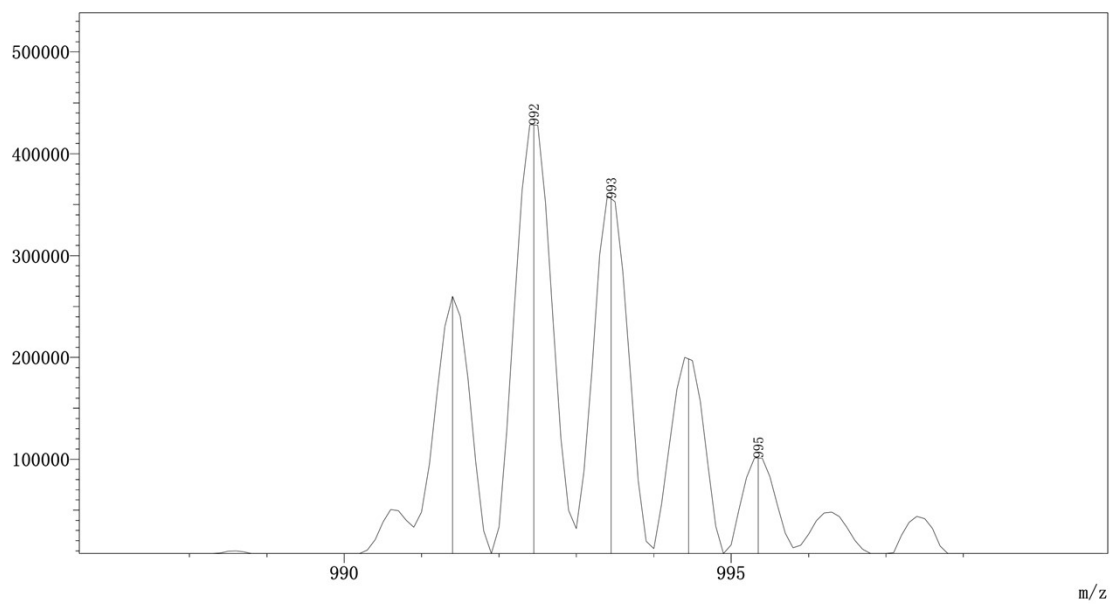

MS spectrum for complex **8**

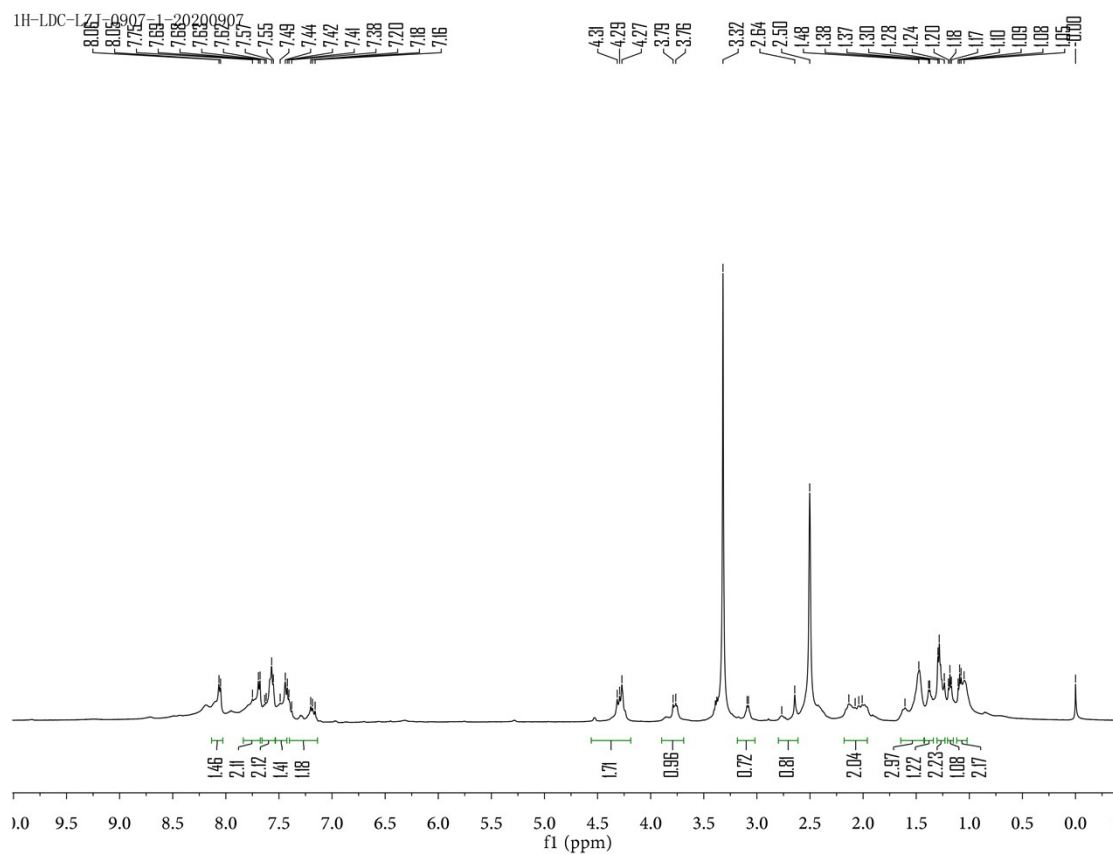

<sup>1</sup>H NMR spectrum for complex **9**

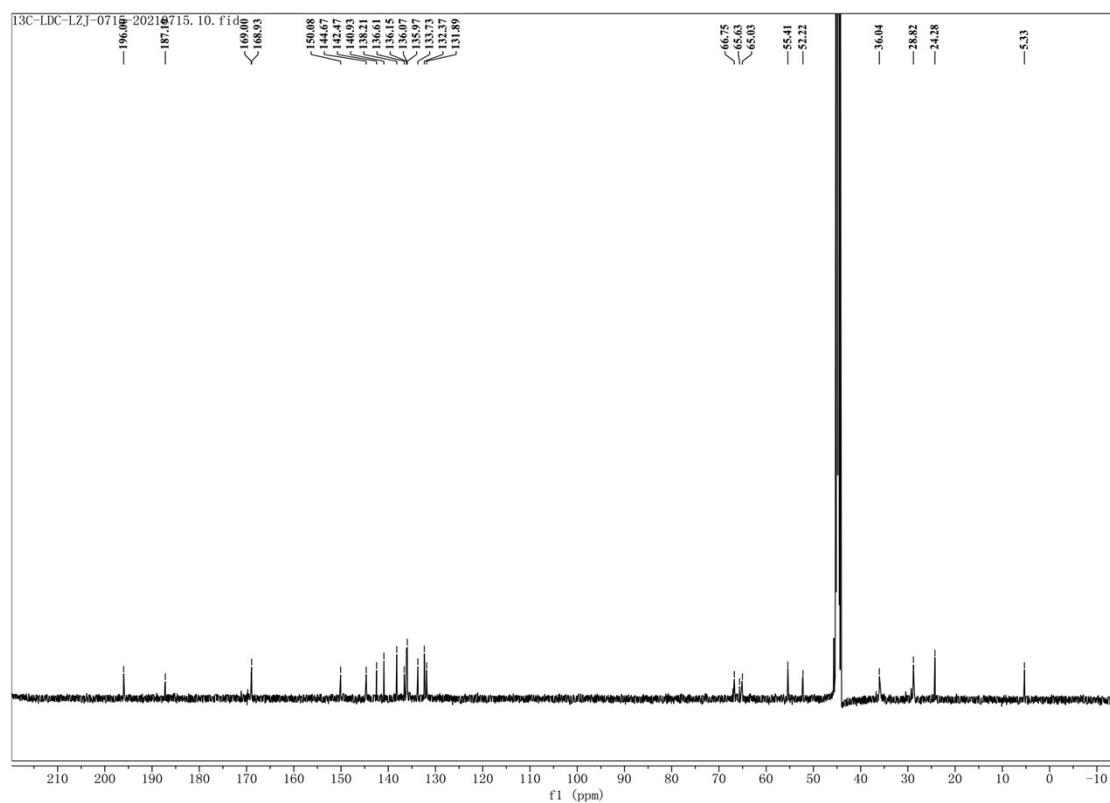

<sup>13</sup>C NMR spectrum for complex **9**

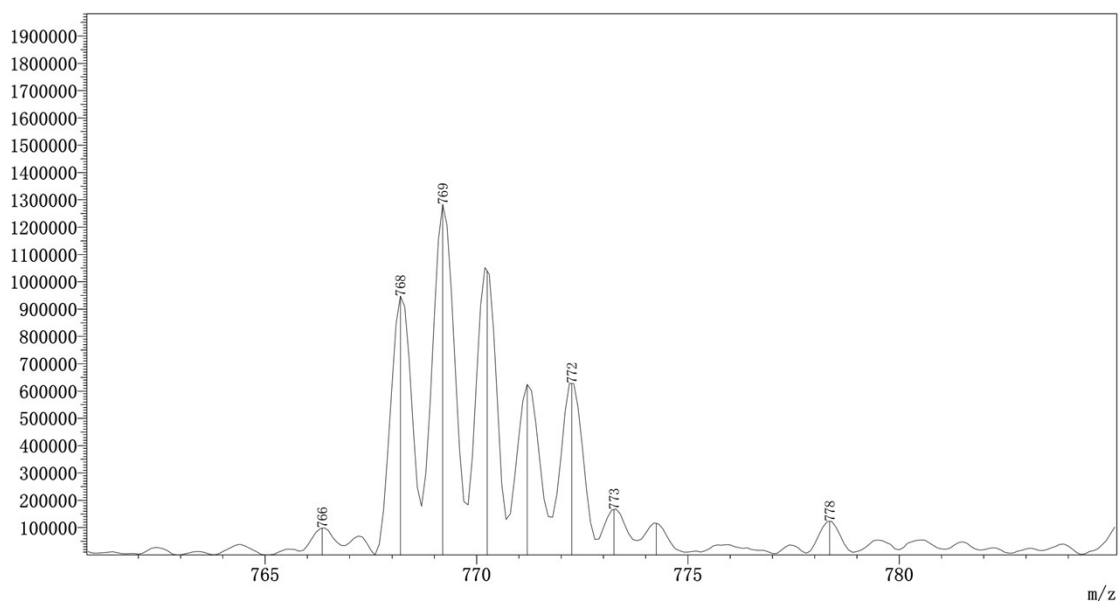

MS spectrum for complex **9**

### Reference

- [S1] Z. Li, Q. Wang, L. Li, Y. Chen, J. Cui, M. Liu, N. Zhang, Z. Liu, J. Han and Z. Wang, *J. Med. Chem.*, 2021, 64, 17920–17935.
- [S2] Q. Wang, Z. Huang, J. Ma, X. Lu, L. Zhang, X. Wang, P.G. Wang, Design, synthesis and biological evaluation of a series of new glycosylated platinum(IV) complexes as antitumor agents. *Dalton Trans.* 45 (2016) 10366–10374.
